# Supplementary material
Source: PubMed Central journal article supplement (PMC10809976)
Supplement: jb.00217-23-s0001.pdf [file jb.00217-23-s0001.pdf]

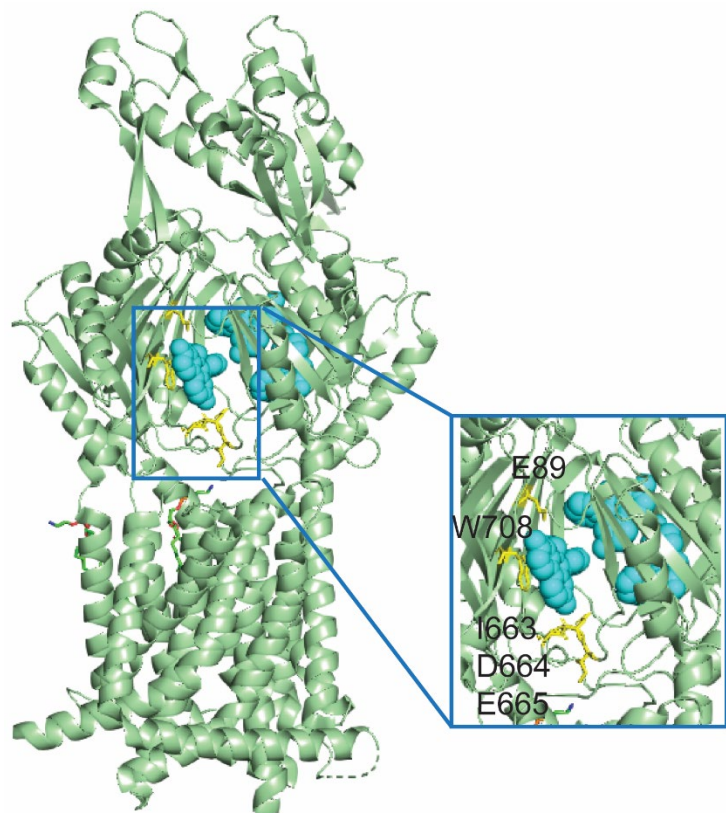

**Figure S1.** Structure of the ligand-bound AdeB protomer. Three Et molecules bound to AdeB are shown as cyan spheres. The insert shows the mutated amino acid residues E89, W708, I663, D664, E665.
